# Supplementary material
Source: PubMed Central journal article supplement (PMC10801911)
Supplement: NIHMS1920862-supplement-1.pdf [file NIHMS1920862-supplement-1.pdf]

Figure S1

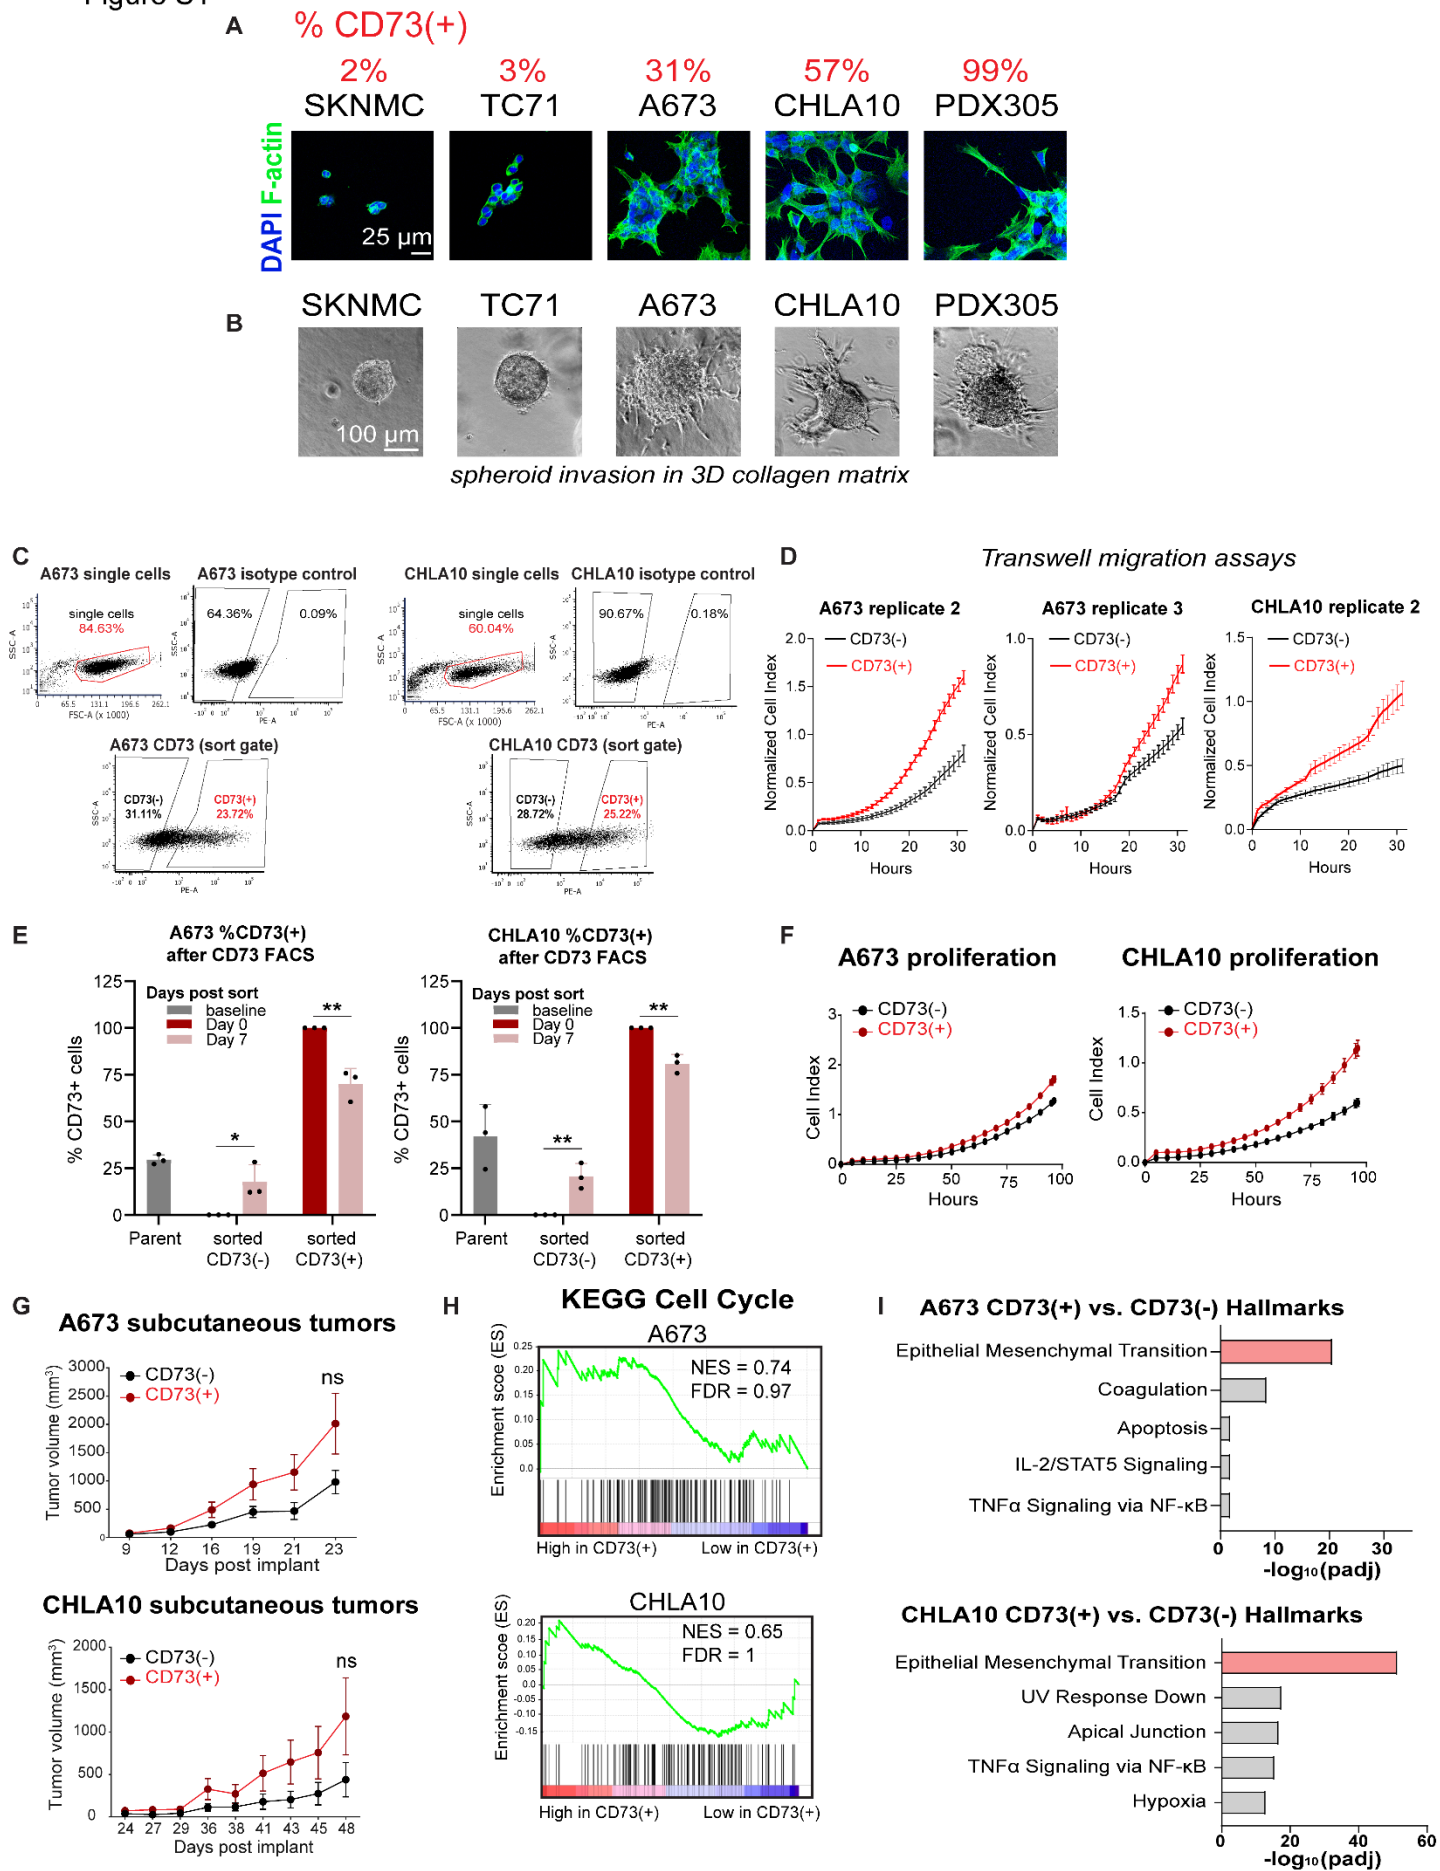

**Supplemental Figure S1. CD73<sup>+</sup> EwS cells retain proliferative and tumorigenic capacity. Related to Figure 1.** A) DAPI and F-actin staining of EwS cell lines in 2D culture. Panels ordered left to right based on CD73<sup>+</sup> cell frequency. B) EwS cell spheroids from the same cell lines after 4 days in 3D spheroid culture in rat tail collagen. C) Flow cytometry gating strategy for CD73 FACS. D) Real-time proliferation assay of CD73<sup>-</sup> vs. CD73<sup>+</sup> sorted cells (n=1). Error bars = SEM of technical replicates. E) After FACS (using CD73-PE antibody) sorted CD73<sup>-</sup> or CD73<sup>+</sup> A673 or CHLA10 cells were cultured normally. 7 days later, cell surface CD73 was measured again by flow cytometry (CD73-BB515 antibody, in case of any residual CD73-PE signal). n=3, *p*-values = unpaired t-tests. F) Left, real-time transwell cell migration assay of isogenic CD73<sup>-</sup> and CD73<sup>+</sup> cells (additional biological replicates, see Figure 1E). G) Subcutaneous tumor growth of CD73<sup>-</sup> and CD73<sup>+</sup> sorted cells implanted in NSG mice (n=5). *p*-values = unpaired t-tests. Error bars = SEM. H) GSEA on RNA-seq data from CD73<sup>+</sup> vs. CD73<sup>-</sup> cells for cell-cycle related genes (KEGG) (n=3). I) Gene ontology (Enrichr) of RNA-seq data for Hallmark gene sets in CD73<sup>+</sup> vs. CD73<sup>-</sup> cells.
