# Supplementary material
Source: PubMed Central journal article supplement (PMC10801911)
Supplement: NIHMS1920862-supplement-2.pdf [file NIHMS1920862-supplement-2.pdf]

Figure S2

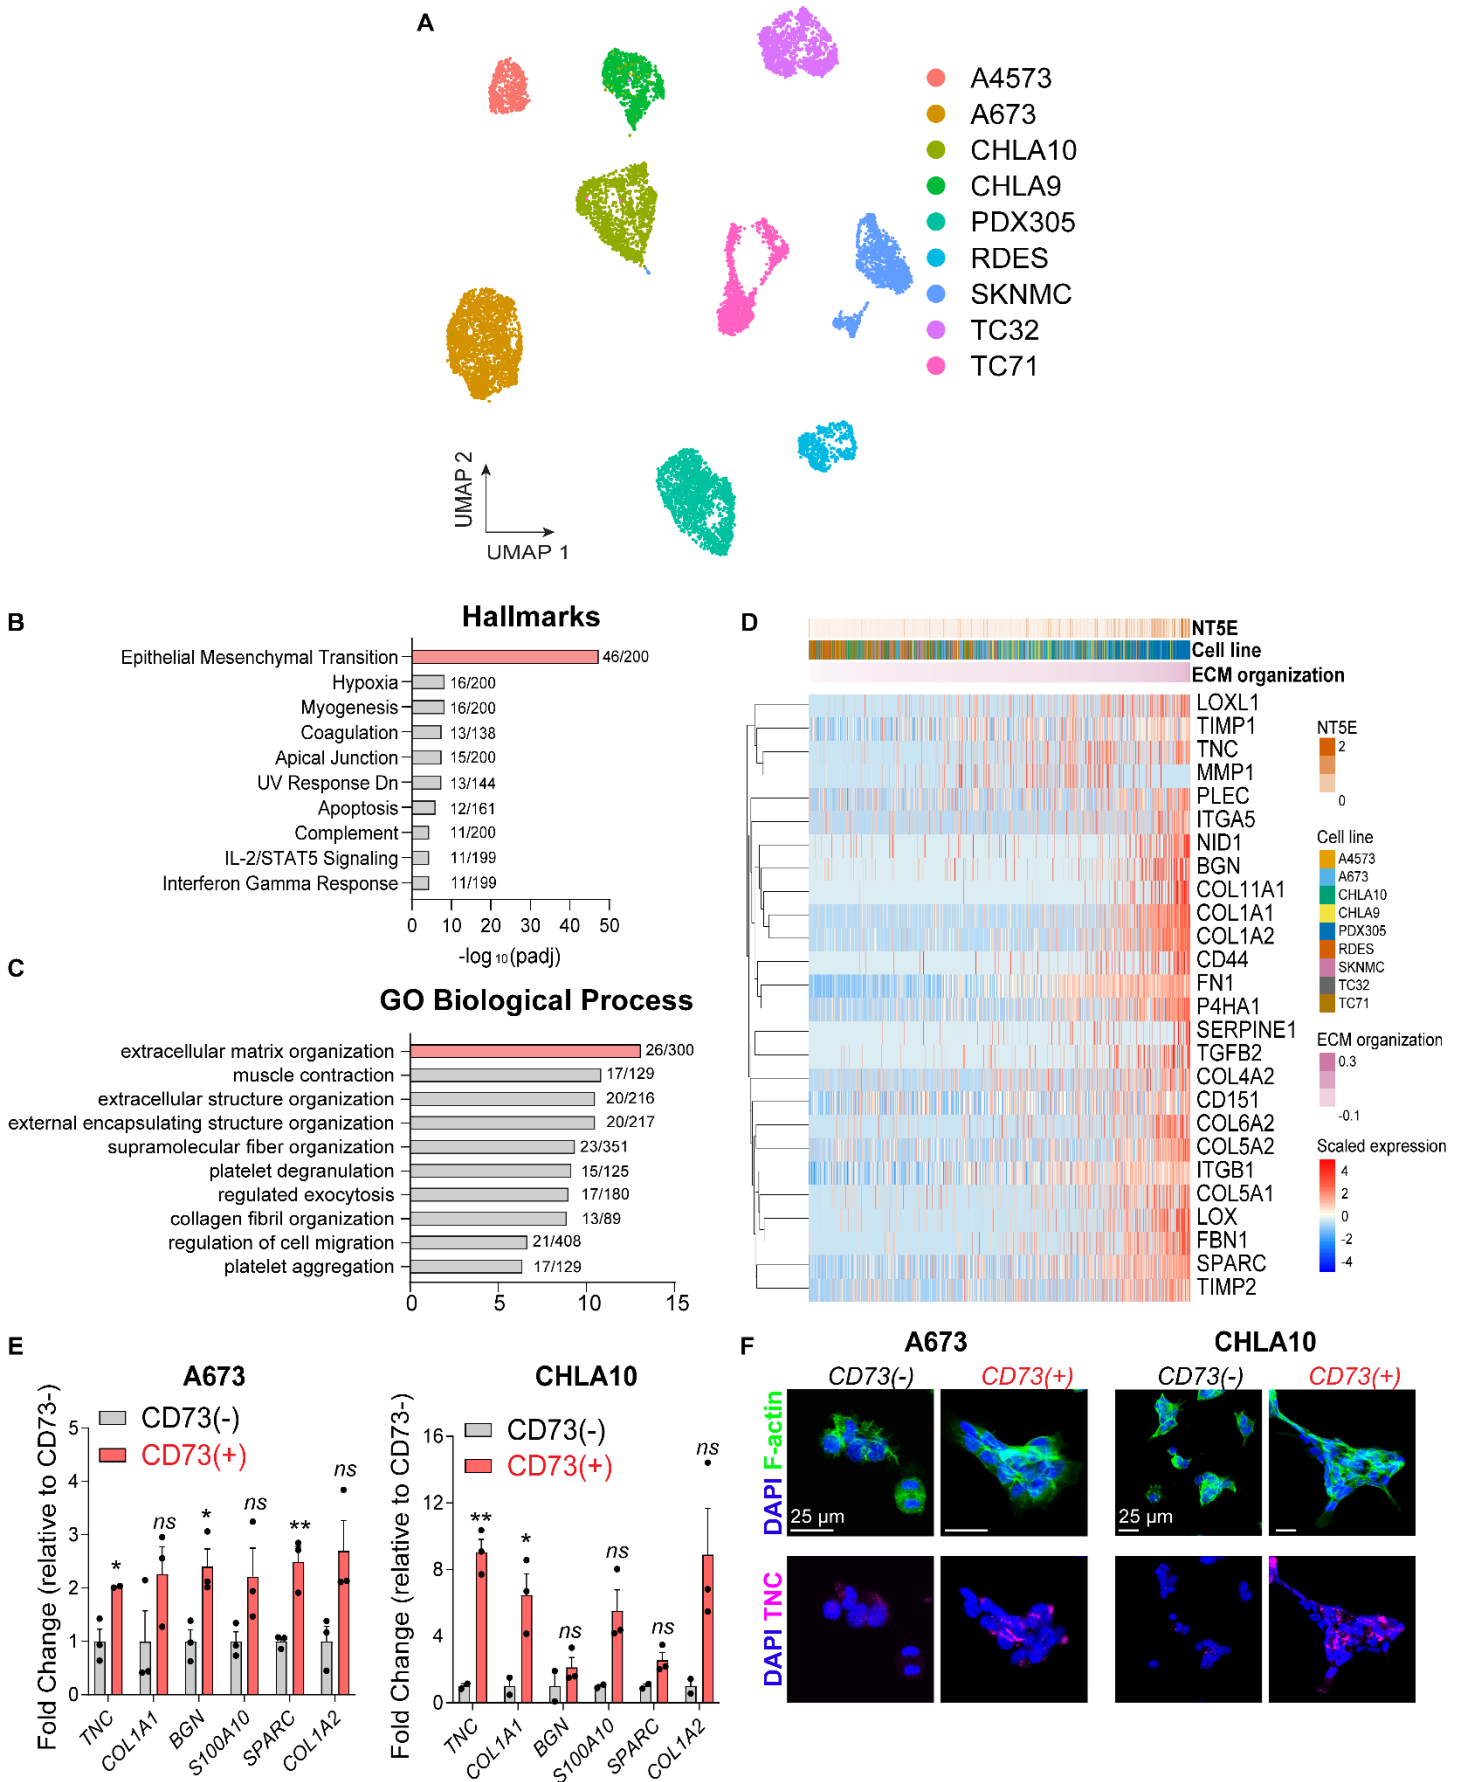

**Supplemental Figure S2. CD73+ cells are enriched in EMT and ECM gene expression. Related to Figure**

**2.** A) UMAP of CITE-seq data showing 9 EwS cell lines. B-C) Gene ontology (Enrichr) of Hallmark gene sets (B) and GO Biological Process (C) of the top 200 significantly differentially expressed genes in NT5E<sup>+</sup> vs. NT5E<sup>-</sup> cells (pooling 9 cell lines). D) Heatmap of expression (by single cell sequencing) of 26 ECM organization genes (GO:0030198) enriched in NT5E<sup>+</sup> cells from all 9 cell lines. Cells ranked by ECM Organization gene set expression. E) RT-qPCR of select *NT5E*-associated markers in CD73-sorted cells (n=3, error bars=SEM, *p*-values = unpaired t-tests). F) Immunofluorescence staining of F-actin and Tenascin-C in CD73-sorted cells in 2D culture, 24 hours after FACS. Representative images of n=2.
