# Supplementary material
Source: PubMed Central journal article supplement (PMC10801911)
Supplement: NIHMS1920862-supplement-4.pdf [file NIHMS1920862-supplement-4.pdf]

Figure S4

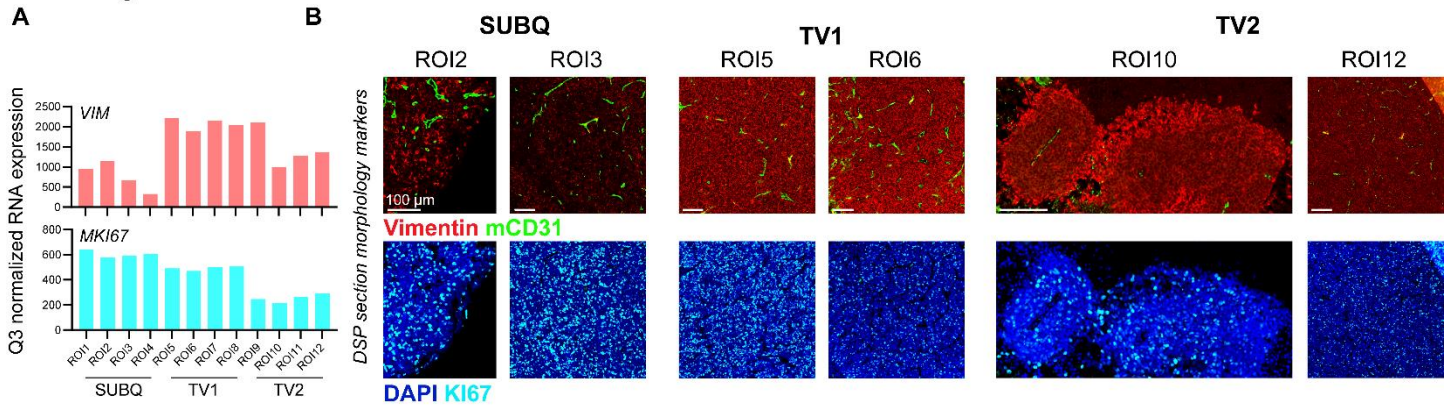

**Supplemental Figure S4. RNA vs. protein concordance in DSP ROIs. Related to Figure 4.** A) Bar graphs depicting normalized probe expression of *VIM* and *MKI67* within each ROI subjected to DSP. B) Immunofluorescence of Vimentin, Ki67, mCD31, and DAPI on select DSP ROIs from each CHLA10 tumor.
