# Supplementary material
Source: PubMed Central journal article supplement (PMC10801911)
Supplement: NIHMS1920862-supplement-5.pdf [file NIHMS1920862-supplement-5.pdf]

Figure S5

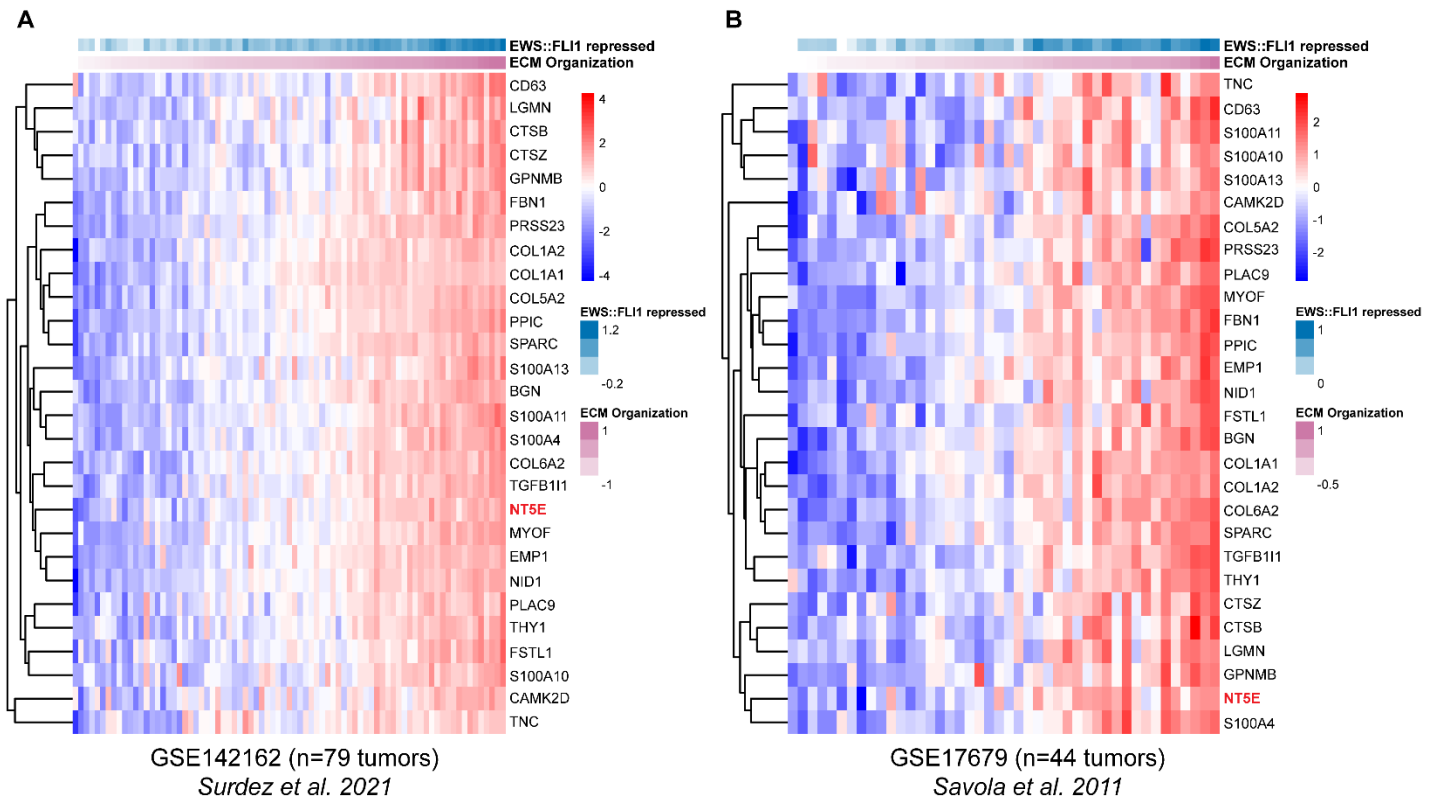

**Supplemental Figure S5. Patient tumor gene expression microarrays display heterogeneity of expression of *NT5E* and associated mesenchymal gene signature. Related to Figure 5. A-B) Heatmaps of *NT5E* and 27 associated marker gene expression vs. EWS::FLI1 repressed genes (31), ranked by ECM organization expression (A) GSE142162 (18) and (B) GSE17679 (42).**
